# Supplementary material for: The Fate of the Missing Spores — Patterns of Realized Dispersal beyond the Closest Vicinity of a Sporulating Moss
Source: PubMed Central journal article supplement (PMC3411459; doi:10.1371/journal.pone.0041987), 2012-07-27
Supplement: pone.0041987.s001.pdf [file pone.0041987.s001.pdf]

## Supporting Information

**Table S1** *The number of pots and colonization rates for all 36 sampling stations.*

| Direction | Distance (m) | No of pots | Colonizable pots* | Colonizations† | Colonization rate | Density (spores/ m <sup>2</sup> ) |
|-----------|--------------|------------|-------------------|----------------|-------------------|-----------------------------------|
| E         | 1            | 6          | 6                 | 4              | 0.67              | 224                               |
| N         | 1            | 6          | 6                 | 6              | 1                 | 439                               |
| S         | 1            | 6          | 6                 | 6              | 1                 | 439                               |
| W         | 1            | 6          | 6                 | 3              | 0.5               | 141                               |
| E         | 5            | 6          | 6                 | 6              | 1                 | 439                               |
| N         | 5            | 6          | 6                 | 4              | 0.67              | 224                               |
| S         | 5            | 6          | 6                 | 5              | 0.83              | 366                               |
| W         | 5            | 6          | 6                 | 6              | 1                 | 439                               |
| E         | 10           | 8          | 8                 | 5              | 0.63              | 200                               |
| N         | 10           | 8          | 8                 | 5              | 0.63              | 200                               |
| S         | 10           | 8          | 8                 | 6              | 0.75              | 283                               |
| W         | 10           | 8          | 7                 | 4              | 0.57              | 173                               |
| E         | 30           | 13         | 11                | 0              | 0                 | 0                                 |
| N         | 30           | 13         | 13                | 0              | 0                 | 0                                 |
| S         | 30           | 13         | 13                | 4              | 0.31              | 75                                |
| W         | 30           | 13         | 6                 | 2              | 0.33              | 83                                |
| E         | 50           | 21         | 20                | 0              | 0                 | 0                                 |
| N         | 50           | 21         | 15                | 0              | 0                 | 0                                 |
| S         | 50           | 21         | 21                | 0              | 0                 | 0                                 |
| W         | 50           | 21         | 19                | 1              | 0.05              | 11                                |
| E         | 80           | 34         | 23                | 1              | 0.04              | 9                                 |
| N         | 80           | 34         | 33                | 1              | 0.03              | 6                                 |
| S         | 80           | 34         | 26                | 1              | 0.04              | 8                                 |
| W         | 80           | 34         | 32                | 0              | 0                 | 0                                 |
| E         | 150          | 63         | 48                | 0              | 0                 | 0                                 |
| N         | 150          | 63         | 42                | 1              | 0.02              | 5                                 |
| S         | 150          | 63         | 54                | 0              | 0                 | 0                                 |
| W         | 150          | 63         | 49                | 1              | 0.02              | 4                                 |
| E         | 300          | 126        | 62                | 3              | 0.05              | 10                                |
| N         | 300          | 126        | 121               | 2              | 0.02              | 3                                 |
| S         | 300          | 126        | 118               | 0              | 0                 | 0                                 |
| W         | 300          | 126        | 121               | 2              | 0.02              | 3                                 |
| E         | 600          | 252        | 219               | 10             | 0.05              | 10                                |
| N         | 600          | 252        | 232               | 0              | 0                 | 0                                 |
| S         | 600          | 252        | 227               | 2              | 0.01              | 2                                 |
| W         | 600          | 252        | 212               | 1              | 0                 | 1                                 |

\*Corresponding to (n) in equation 1, † Corresponding to (k) in equation 1.
